# Supplementary material
Source: publisher figshare collection journal article supplement (https://frontiersin.figshare.com/ndownloader/files/14627726)
Supplement: Supplementary file [file 14627726]

## Supplementary Material

### Lipid production from waste materials in seawater-based medium by the yeast *Yarrowia lipolytica*

Adam Dobrowolski<sup>1\*</sup>, Katarzyna Drzymała<sup>1</sup>, Dorota A. Rzechonek<sup>1</sup>, Paweł Mituła<sup>2</sup>,  
Aleksandra M. Mirończuk<sup>1</sup>

\*corresponding author

<sup>1</sup> Department of Biotechnology and Food Microbiology, Wrocław University of Environmental and Life Sciences, Chelmońskiego 37, 51-630, Wrocław, Poland

<sup>2</sup> Institute of Environmental Engineering, Wrocław University of Environmental and Life Sciences, Grunwaldzki sq 24, 50-363, Wrocław, Poland

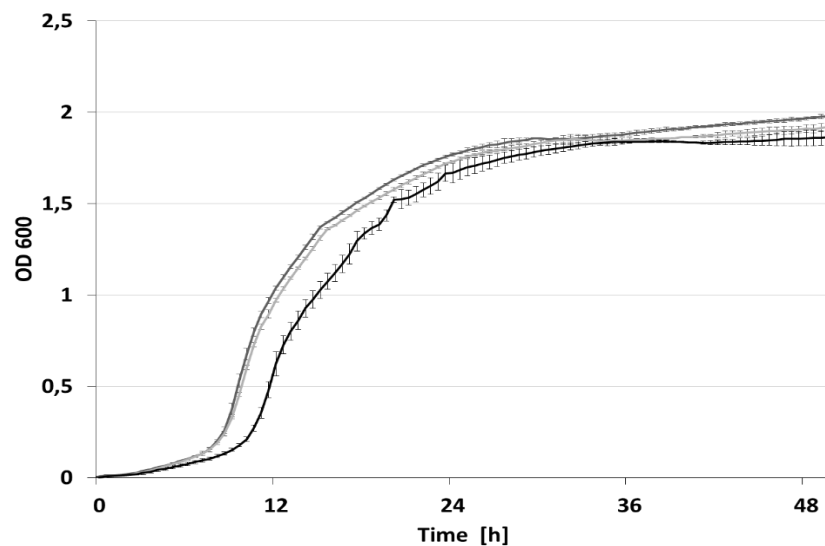

Supplementary Figure 1. Growth curves of *Y. lipolytica* A101 in medium based on seawater with salinity 36 g/L (dark gray), salinity 40 g/L (light gray) and 50 g/L (black). Strains were grown on YPD medium containing 2% glucose as carbon source. Experiment was performed at 28°C under constant agitation using Bioscreen C. The error bars present standard deviations.

Supplementary Table 1. Fatty acid profile (%) of lipid content produced by *Y. lipolytica* A101 and the engineered AJD pADDGA1 strains grown in culture media containing glucose or glycerol as a carbon source prepared on freshwater or seawater basis (SW) in shake-flasks experiment.

|          |                | <b>16:0</b> | <b>16:1</b> | <b>18:0</b> | <b>18:1</b> | <b>18:2</b> | <b>others</b> |
|----------|----------------|-------------|-------------|-------------|-------------|-------------|---------------|
| GLUCOSE  | <b>A101</b>    | 10.56       | 8.9         | 10.1        | 63.4        | 5.2         | 1.84          |
|          | <b>A101-SW</b> | 12.45       | 8.27        | 11.95       | 59.85       | 5.72        | 1.76          |
|          | <b>DGA1</b>    | 9.63        | 8.28        | 16.12       | 59.5        | 4.51        | 1.96          |
|          | <b>DGA1-SW</b> | 12.39       | 18.9        | 6.07        | 56.35       | 4.41        | 1.88          |
|          |                |             |             |             |             |             |               |
| GLYCEROL | <b>A101</b>    | 16.83       | 4.08        | 24.3        | 49.02       | 3.67        | 2.1           |
|          | <b>A101-SW</b> | 17.31       | 4.39        | 24.05       | 48.79       | 3.34        | 2.12          |
|          | <b>DGA1</b>    | 12.58       | 4.59        | 22.26       | 55          | 3.51        | 2.06          |
|          | <b>DGA1-SW</b> | 15.15       | 3.93        | 25          | 50.59       | 2.92        | 2.41          |
